# Supplementary material
Source: ML conference proceedings conference paper supplement (https://openaccess.thecvf.com/content/WACV2023/html/OBrien_Mapping_DNN_Embedding_WACV_2023_paper.html)
Supplement: Supplementary file 1 [file OBrien_Mapping_DNN_Embedding_WACV_2023_supplemental.pdf]

## A. NGP F1 Scores

In addition to the graphical results, presented in Figure 4, we include F1 Scores for the NGP task in Table A. For each NGP experiment, the best results are shown in bold.

| Operating Domain | NGP          | DN           | VGG          | AN           |
|------------------|--------------|--------------|--------------|--------------|
| CityScapes       | FC - Bal     | 0.917        | 0.837        | 0.790        |
| CityScapes       | FC - Not Bal | 0.946        | 0.962        | 0.947        |
| CityScapes       | ATP          | 0.954        | <b>1.000</b> | <b>0.995</b> |
| CityScapes       | CS           | 0.956        | 0.984        | 0.964        |
| CityScapes       | DoC          | 0.959        | 0.992        | 0.981        |
| CityScapes       | DT Map       | <b>0.995</b> | 0.997        | 0.988        |
| JAAD             | FC - Bal     | 0.953        | 0.884        | 0.781        |
| JAAD             | FC - Not Bal | 0.972        | 0.972        | 0.955        |
| JAAD             | ATP          | 0.974        | <b>0.991</b> | <b>0.990</b> |
| JAAD             | CS           | 0.954        | 0.958        | 0.927        |
| JAAD             | DoC          | 0.972        | <b>0.991</b> | 0.988        |
| JAAD             | DT Map       | <b>0.986</b> | 0.989        | 0.976        |
| ISIC             | FC - Bal     | 0.765        | 0.906        | 0.957        |
| ISIC             | FC - Not Bal | 0.922        | 0.894        | 0.895        |
| ISIC             | ATP          | 0.910        | 0.958        | 0.962        |
| ISIC             | CS           | <b>0.971</b> | 0.908        | 0.923        |
| ISIC             | DoC          | 0.914        | 0.935        | 0.937        |
| ISIC             | DT Map       | 0.908        | <b>0.996</b> | <b>0.990</b> |
| CODaN            | FC - Bal     | 0.822        | 0.741        | 0.606        |
| CODaN            | FC - Not Bal | 0.942        | 0.967        | 0.897        |
| CODaN            | ATP          | 0.944        | 0.953        | 0.913        |
| CODaN            | DoC          | 0.954        | <b>0.997</b> | <b>0.969</b> |
| CODaN            | DT Map       | <b>0.979</b> | 0.962        | 0.943        |
| CIFAR-10         | FC - Bal     | 0.838        | 0.659        | 0.576        |
| CIFAR-10         | FC - Not Bal | 0.955        | <b>0.996</b> | 0.949        |
| CIFAR-10         | ATP          | 0.954        | 0.962        | 0.940        |
| CIFAR-10         | DoC          | 0.961        | 0.978        | <b>0.976</b> |
| CIFAR-10         | DT Map       | <b>0.978</b> | 0.964        | 0.960        |

Table 1. NGP F1 results for pedestrian, melanoma, and animal classification tasks with different architectures. The NGP methods are listed as Fully Connected - Balanced (FC - Bal), Fully Connected - Not Balanced (FC - Not Bal), Average Test Performance (ATP), Context Subspace (CS), Difference of Confidences (DoC), and Decision Tree Map (DT Map). The NN architectures are listed as DenseNet (DN), VGG, and AlexNet (AN). The best NGP method for a given OD and architecture is listed in bold.
